# Supplementary material for: Using transrectal ultrasound to examine the effect of exogenous progesterone on early embryonic loss in sheep
Source: PubMed Central journal article supplement (PMC5571956; doi:10.1371/journal.pone.0183659), 2017-08-25
Supplement: pone.0183659.s001.pdf [file pone.0183659.s001.pdf]

| Image ref | Image                                                                               | Measured structure                                                   | Size (mm)                     |
|-----------|-------------------------------------------------------------------------------------|----------------------------------------------------------------------|-------------------------------|
| A         | 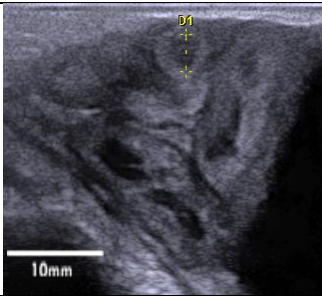   | Endometrium height measured on Day 10 (D1)                           | D1=4.12                       |
| B         |    | 2 Corpora lutea present on the ovary, measured on Day 10 (D1 and D2) | D 1 x 1.18 mm<br>D2 x 1,48 mm |
| C         |   | Trophoblastic expansion measured on Day 12 (D3)                      | D3= 6.68                      |
| D         |  | Trophoblastic expansion at Day 14 (D5)<br>Embryonic vesicle          | D3=7.92                       |
| E         |  | Embryo at Day 17 (D3)                                                | D3= 4.14                      |

|   |                                                                                   |                                                                          |         |
|---|-----------------------------------------------------------------------------------|--------------------------------------------------------------------------|---------|
| F | 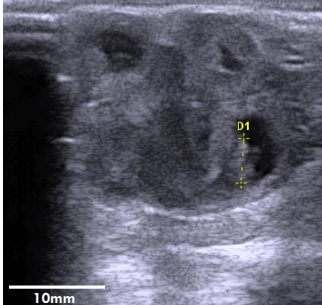 | Embryo (D1) clearly visible within embryonic vesicle, measured on Day 19 | D1=5.46 |
| G |  | Embryo (D1) surrounded by amniotic membrane, measured on Day 29          | D1=13.9 |
